# Supplementary material
Source: PubMed Central journal article supplement (PMC5745811)
Supplement: NIHMS923283-supplement-4.pdf [file NIHMS923283-supplement-4.pdf]

**Supplementary Table 2.** Effects of ascites, varices, and encephalopathy (current or past) on biochemical test results in Cases. Means are adjusted for sex, age, and abstinence status. Note that the *p* values for ascites, varices, and encephalopathy are from an analysis in which all three were entered so they represent the independent effects of each. *p* values less than 0.0028 (0.05/18) may be considered significant.

| Test               | Symptom | Ascites |       |                | Varices |       |                | Encephalopathy |       |                |
|--------------------|---------|---------|-------|----------------|---------|-------|----------------|----------------|-------|----------------|
|                    |         | Mean    | SEM   | <i>p</i> value | Mean    | SEM   | <i>p</i> value | Mean           | SEM   | <i>p</i> value |
| Hemoglobin         | Absent  | 125.5   | 1.8   | 1.89E-08       | 122.6   | 1.4   | 0.0010         | 121.1          | 1.1   | 0.171          |
|                    | Present | 114.4   | 0.9   |                | 117.3   | 1.2   |                | 118.8          | 1.5   |                |
| White cell count   | Absent  | 6.28    | 0.26  | 0.012          | 7.06    | 0.20  | 1.78E-04       | 6.89           | 0.16  | 0.038          |
|                    | Present | 6.99    | 0.13  |                | 6.20    | 0.17  |                | 6.37           | 0.22  |                |
| Platelet count     | Absent  | 145.1   | 5.4   | 0.194          | 158.0   | 4.1   | 6.42E-12       | 142.7          | 3.3   | 0.572          |
|                    | Present | 137.3   | 2.8   |                | 124.4   | 3.7   |                | 139.7          | 4.7   |                |
| INR                | Absent  | 1.253   | 0.035 | 3.62E-09       | 1.365   | 0.027 | 0.799          | 1.335          | 0.021 | 0.051          |
|                    | Present | 1.485   | 0.018 |                | 1.373   | 0.024 |                | 1.402          | 0.031 |                |
| Albumin            | Absent  | 37.33   | 0.55  | 1.50E-07       | 36.19   | 0.42  | 0.053          | 36.46          | 0.33  | 0.0047         |
|                    | Present | 34.11   | 0.28  |                | 35.25   | 0.37  |                | 34.98          | 0.47  |                |
| Bilirubin (log)    | Absent  | 1.328   | 0.035 | 2.00E-09       | 1.408   | 0.027 | 0.019          | 1.430          | 0.021 | 0.395          |
|                    | Present | 1.561   | 0.018 |                | 1.481   | 0.023 |                | 1.459          | 0.030 |                |
| Creatinine (log)   | Absent  | 1.855   | 0.014 | 7.03E-04       | 1.879   | 0.010 | 0.759          | 1.863          | 0.008 | 0.0067         |
|                    | Present | 1.906   | 0.007 |                | 1.883   | 0.009 |                | 1.899          | 0.012 |                |
| ALT (log)          | Absent  | 1.559   | 0.020 | 9.66E-08       | 1.505   | 0.015 | 0.573          | 1.499          | 0.012 | 0.875          |
|                    | Present | 1.442   | 0.010 |                | 1.495   | 0.013 |                | 1.502          | 0.017 |                |
| AST (log)          | Absent  | 1.715   | 0.019 | 0.200          | 1.701   | 0.015 | 0.896          | 1.716          | 0.012 | 0.131          |
|                    | Present | 1.688   | 0.010 |                | 1.703   | 0.013 |                | 1.688          | 0.016 |                |
| GGT (log)          | Absent  | 2.230   | 0.031 | 9.66E-11       | 2.144   | 0.024 | 0.052          | 2.165          | 0.019 | 0.0018         |
|                    | Present | 2.003   | 0.016 |                | 2.089   | 0.021 |                | 2.068          | 0.028 |                |
| AST/ALT ratio      | Absent  | 1.62    | 0.07  | 1.19E-04       | 1.80    | 0.06  | 0.722          | 1.87           | 0.05  | 0.015          |
|                    | Present | 1.94    | 0.04  |                | 1.77    | 0.05  |                | 1.70           | 0.06  |                |
| Total cholesterol  | Absent  | 4.618   | 0.121 | 6.26E-11       | 4.248   | 0.092 | 0.160          | 4.145          | 0.072 | 0.652          |
|                    | Present | 3.727   | 0.062 |                | 4.097   | 0.083 |                | 4.200          | 0.108 |                |
| Triglyceride (log) | Absent  | 0.097   | 0.019 | 6.39E-06       | 0.065   | 0.015 | 0.049          | 0.040          | 0.012 | 0.388          |
|                    | Present | 0.000   | 0.010 |                | 0.032   | 0.013 |                | 0.057          | 0.017 |                |
| LDL cholesterol    | Absent  | 2.703   | 0.101 | 2.38E-05       | 2.495   | 0.077 | 0.535          | 2.477          | 0.059 | 0.848          |
|                    | Present | 2.231   | 0.053 |                | 2.439   | 0.069 |                | 2.457          | 0.092 |                |
| HDL cholesterol    | Absent  | 1.315   | 0.053 | 8.28E-07       | 1.168   | 0.041 | 0.999          | 1.173          | 0.031 | 0.859          |
|                    | Present | 1.021   | 0.028 |                | 1.168   | 0.037 |                | 1.163          | 0.049 |                |
| Random Glucose     | Absent  | 7.21    | 0.28  | 0.098          | 6.80    | 0.22  | 0.221          | 6.98           | 0.17  | 0.816          |
|                    | Present | 6.69    | 0.14  |                | 7.10    | 0.19  |                | 6.92           | 0.24  |                |
| Fasting Glucose    | Absent  | 5.92    | 0.39  | 0.115          | 6.54    | 0.30  | 0.166          | 6.19           | 0.25  | 0.654          |
|                    | Present | 6.65    | 0.22  |                | 6.03    | 0.27  |                | 6.37           | 0.34  |                |
| MELD               | Absent  | 10.89   | 0.47  | 7.20E-15       | 12.79   | 0.36  | 0.467          | 12.53          | 0.28  | 0.073          |
|                    | Present | 15.00   | 0.24  |                | 13.10   | 0.32  |                | 13.36          | 0.41  |                |
